# Supplementary material for: Minor taxa in human skin microbiome contribute to the personal identification
Source: PLOS journal article supplement (doi:10.1371/journal.pone.0199947), 2018-07-25
Supplement: S1 (10.1371/journal.pone.0199947.s001) [file journal.pone.0199947.s001]

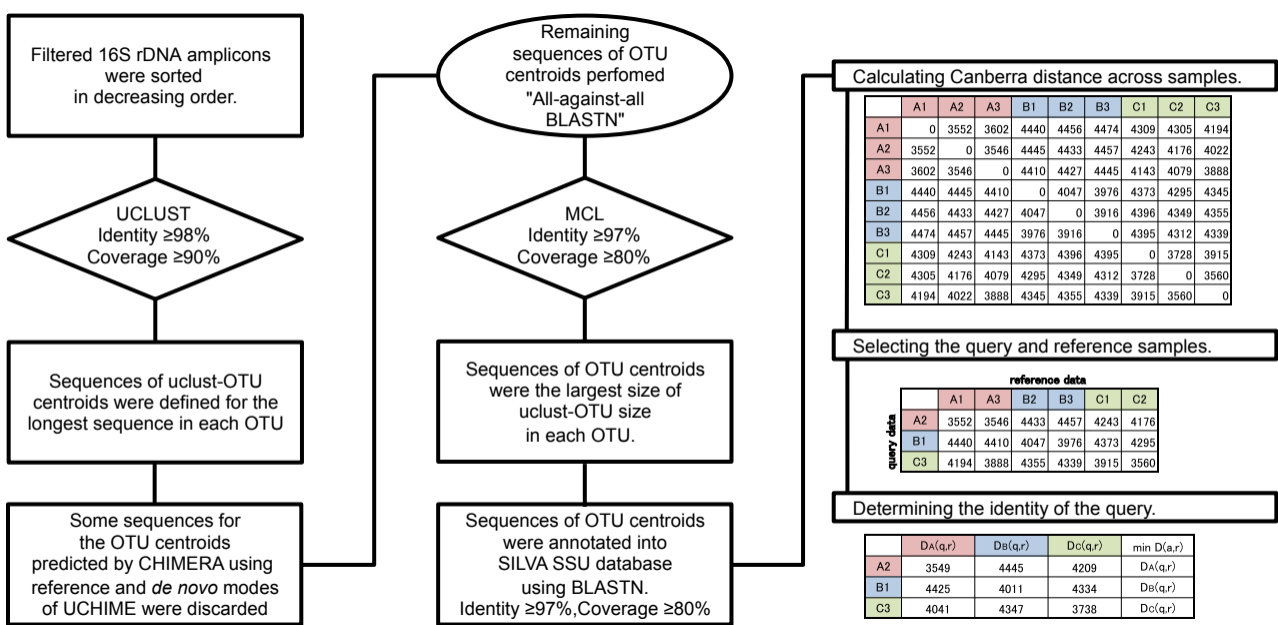

Filtered 16S rDNA amplicons were sorted in decreasing order.

UCLUST  
Identity  $\geq 98\%$   
Coverage  $\geq 90\%$

Sequences of uclust-OTU centroids were defined for the longest sequence in each OTU

Some sequences for the OTU centroids predicted by CHIMERA using reference and *de novo* modes of UCHIME were discarded

Remaining sequences of OTU centroids performed "All-against-all BLASTN"

MCL  
Identity  $\geq 97\%$   
Coverage  $\geq 80\%$

Sequences of OTU centroids were the largest size of uclust-OTU size in each OTU.

Sequences of OTU centroids were annotated into SILVA SSU database using BLASTN. Identity  $\geq 97\%$ , Coverage  $\geq 80\%$

Calculating Canberra distance across samples.

|    | A1   | A2   | A3   | B1   | B2   | B3   | C1   | C2   | C3   |
|----|------|------|------|------|------|------|------|------|------|
| A1 | 0    | 3552 | 3602 | 4440 | 4456 | 4474 | 4309 | 4305 | 4194 |
| A2 | 3552 | 0    | 3546 | 4445 | 4433 | 4457 | 4243 | 4176 | 4022 |
| A3 | 3602 | 3546 | 0    | 4410 | 4427 | 4445 | 4143 | 4079 | 3888 |
| B1 | 4440 | 4445 | 4410 | 0    | 4047 | 3976 | 4373 | 4295 | 4345 |
| B2 | 4456 | 4433 | 4427 | 4047 | 0    | 3916 | 4396 | 4349 | 4355 |
| B3 | 4474 | 4457 | 4445 | 3976 | 3916 | 0    | 4395 | 4312 | 4339 |
| C1 | 4309 | 4243 | 4143 | 4373 | 4396 | 4395 | 0    | 3728 | 3915 |
| C2 | 4305 | 4176 | 4079 | 4295 | 4349 | 4312 | 3728 | 0    | 3560 |
| C3 | 4194 | 4022 | 3888 | 4345 | 4355 | 4339 | 3915 | 3560 | 0    |

Selecting the query and reference samples.

|            |    | reference data |      |      |      |      |      |
|------------|----|----------------|------|------|------|------|------|
|            |    | A1             | A3   | B2   | B3   | C1   | C2   |
| query data | A2 | 3552           | 3546 | 4433 | 4457 | 4243 | 4176 |
|            | B1 | 4440           | 4410 | 4047 | 3976 | 4373 | 4295 |
|            | C3 | 4194           | 3888 | 4355 | 4339 | 3915 | 3560 |

Determining the identity of the query.

|    | $D_A(q,r)$ | $D_B(q,r)$ | $D_C(q,r)$ | $\min D(a,r)$ |
|----|------------|------------|------------|---------------|
| A2 | 3549       | 4445       | 4209       | $D_A(q,r)$    |
| B1 | 4425       | 4011       | 4334       | $D_B(q,r)$    |
| C3 | 4041       | 4347       | 3738       | $D_C(q,r)$    |
